# Supplementary material for: Facile adaptation of 1D Mn(ii) chain motifs to form 3D azo-pyridine-based coordination polymers
Source: Royal Society of Chemistry journal article supplement (doi:10.1039/c6ce02493a), 2017-01-01
Supplement: c6ce02493a1.pdf [file c6ce02493a1.pdf]

## Electronic Supplementary Information

# Facile adaptation of 1D Mn(II) chain motifs to form 3D azo-pyridine-based coordination polymers

Ayuk M. Ako,<sup>\*a</sup> Chris S. Hawes,<sup>b</sup> Brendan Twamley<sup>a</sup> and Wolfgang Schmitt<sup>\*a</sup>

<sup>a</sup>*School of Chemistry, Trinity College Dublin, The University of Dublin, Dublin 2, Ireland. Email: [akoayukm@tcd.ie](mailto:akoayukm@tcd.ie), [schmittw@tcd.ie](mailto:schmittw@tcd.ie)*

<sup>b</sup>*School of Chemistry, Trinity Biomedical Sciences Institute, Trinity College Dublin, The University of Dublin, Dublin 2, Ireland.*

### Contents

|                                                                                          |    |
|------------------------------------------------------------------------------------------|----|
| Fig S1. Thermogravimetric analysis.....                                                  | S2 |
| Fig S2. Powder X-ray Diffraction Analysis.....                                           | S2 |
| Fig S3. Comparison of the <i>poly</i> -[Mn(azopy)] chains in <b>1</b> and <b>3</b> ..... | S4 |
| Table S1 Hydrogen bonding parameters for complexes <b>1</b> and <b>3</b> .....           | S5 |

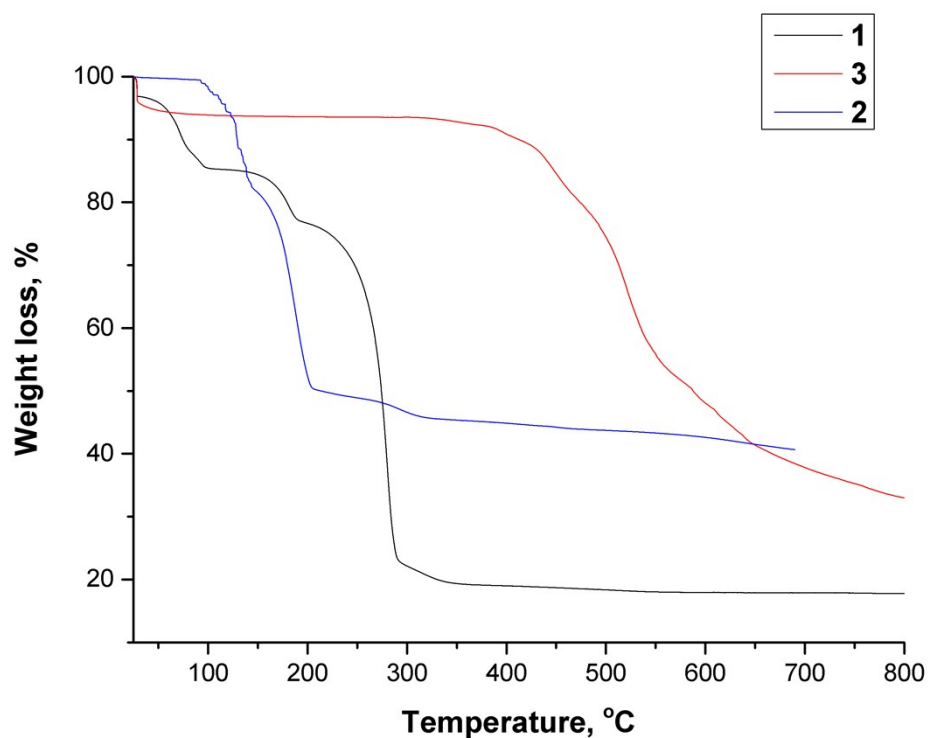

Fig. S1 TGA plot of compounds **1-3** measured under a nitrogen atmosphere (heating rate 2 °C min<sup>-1</sup>); Comment: Compound **3** was dried and stored at room temperature and the constitutional CH<sub>3</sub>CN molecules were lost prior to the measurement.

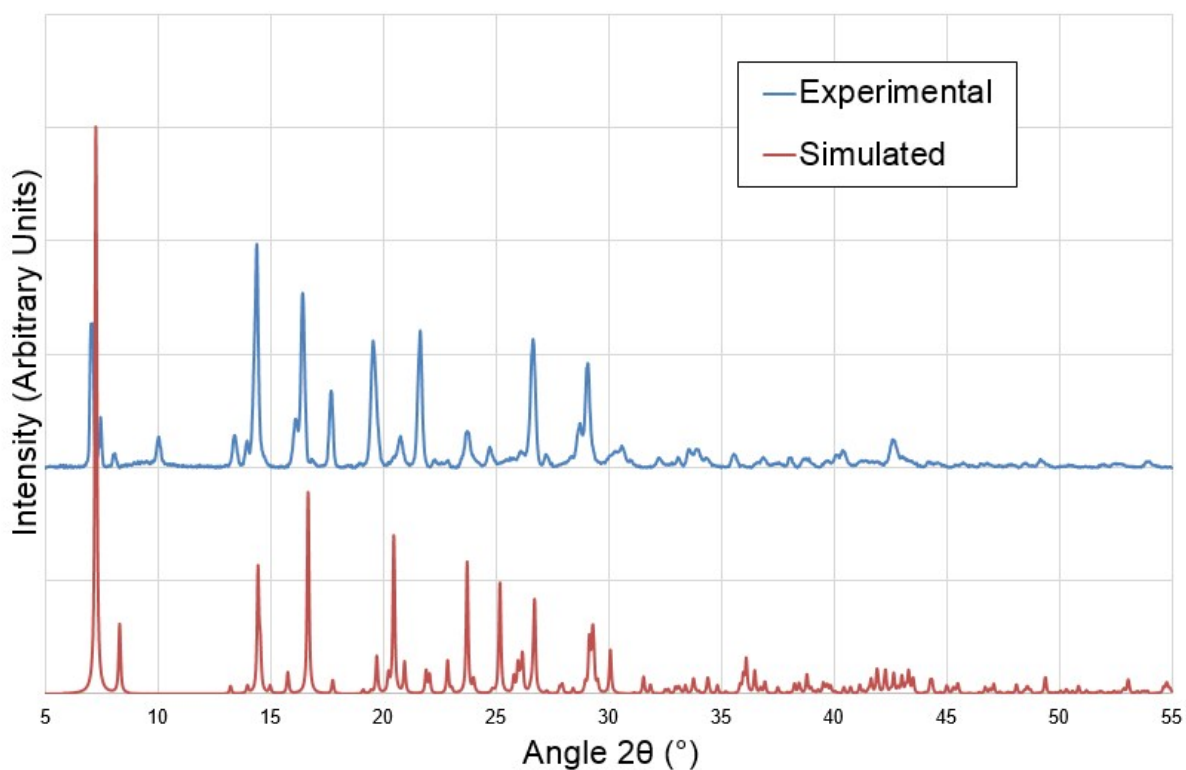

Fig. S2 X-ray powder diffraction pattern for complex **1**, measured at room temperature (blue) compared with the calculated pattern from the single crystal data at 100K (red). The signal at ca. 10° results most likely from a small quantity of an impurity that derive from the reactants.

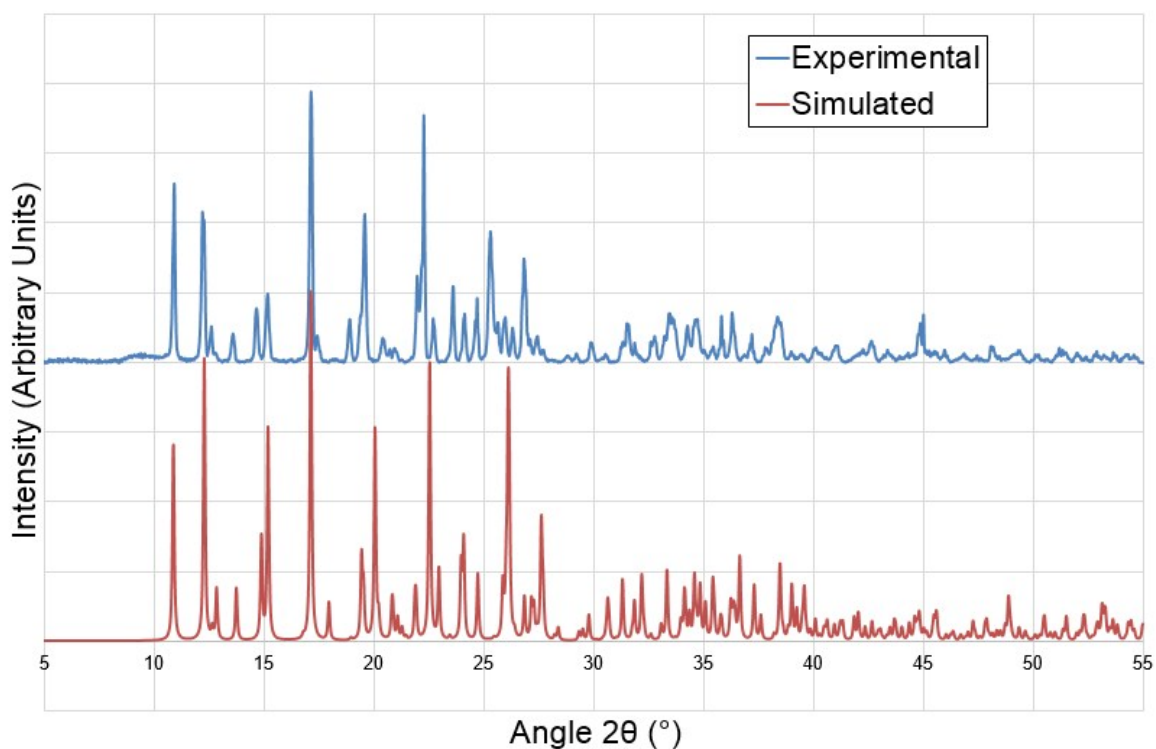

Fig.S3 X-ray powder diffraction pattern for complex **2**, measured at room temperature (blue) compared with the calculated pattern from the single crystal data at 100K (red).

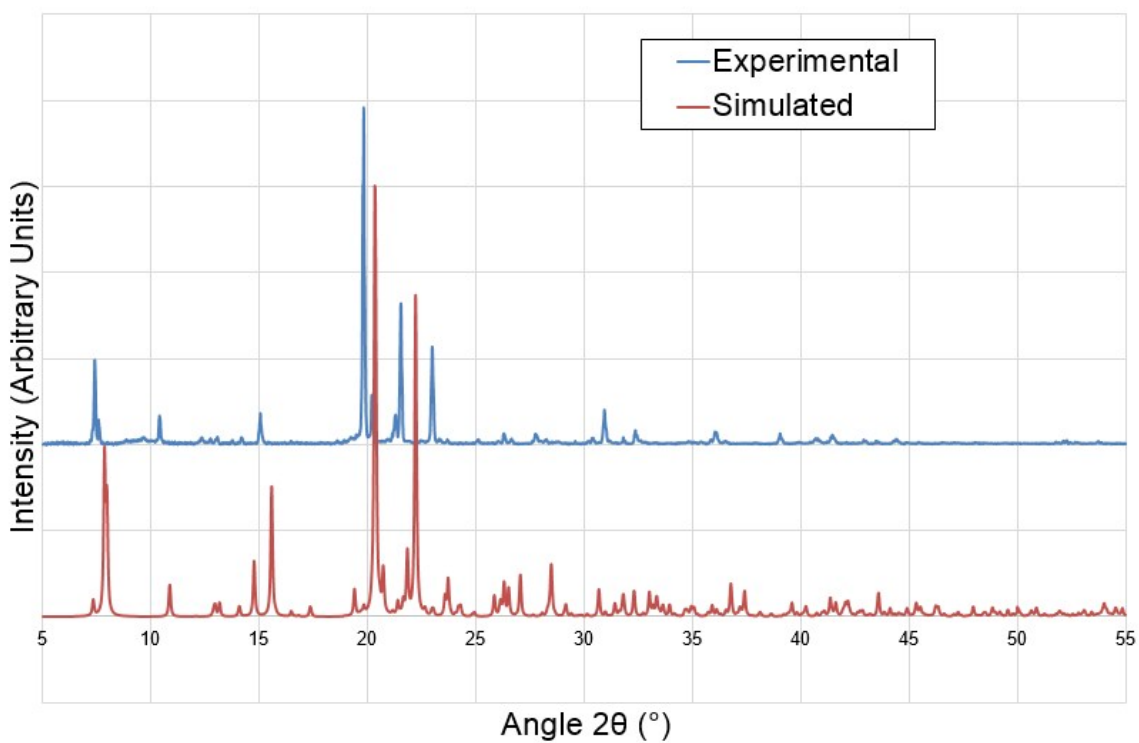

Fig. S4 X-ray powder diffraction pattern for complex **3**, measured at room temperature (blue) compared with the calculated pattern from the single crystal data at 100K (red).

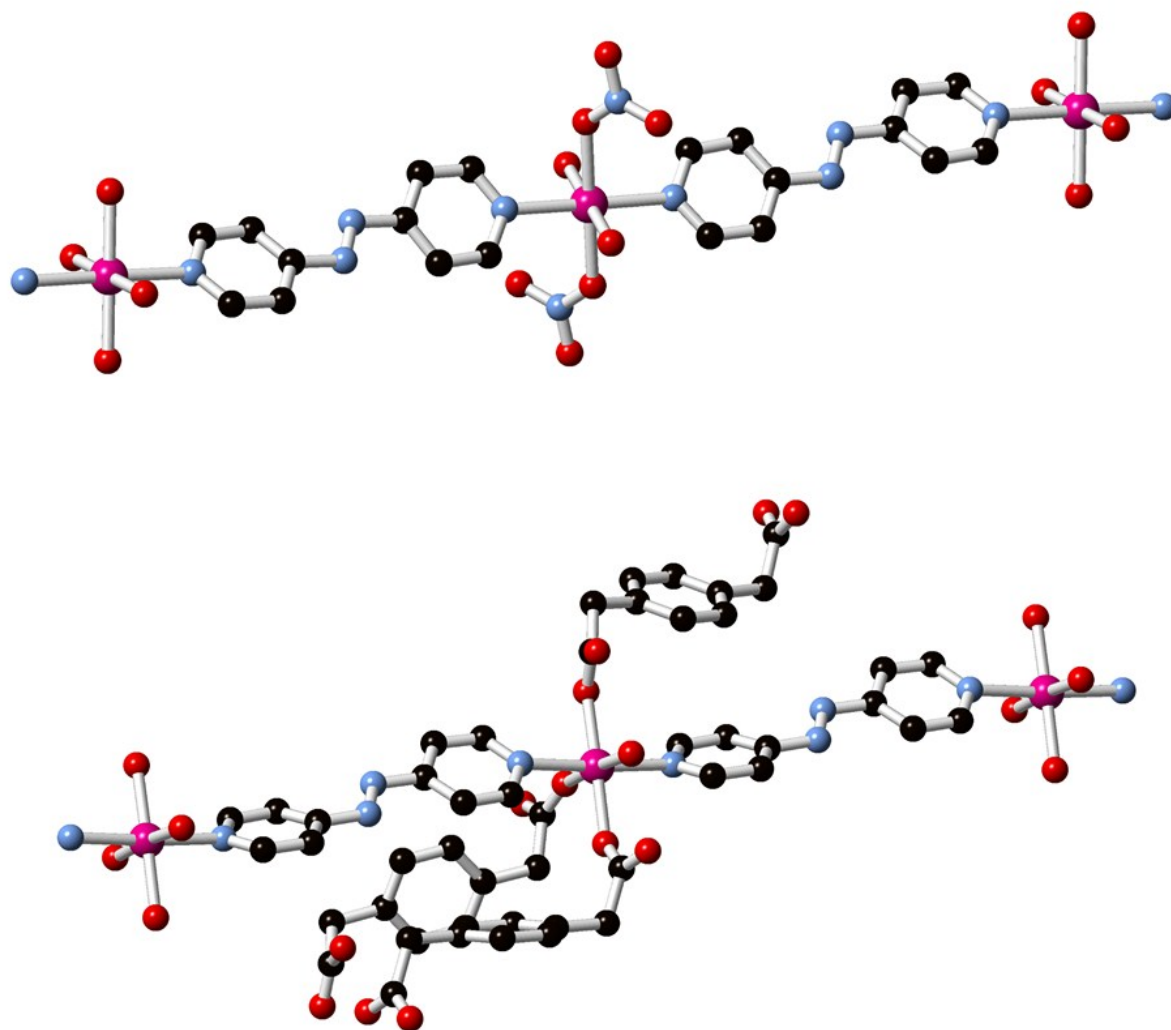

Fig. S5 Comparison of the *poly*-[Mn(azopy)] linear repeating unit in the structures of **1** (top) and **3** (bottom). Hydrogen atoms are omitted for clarity.

Table S1 Hydrogen bonding parameters for complexes **1** and **3**.

| <b>D</b>         | <b>H</b> | <b>A</b>        | <b>d(D-H)/Å</b> | <b>d(H-A)/Å</b> | <b>d(D-A)/Å</b> | <b>D-H-A/°</b> |
|------------------|----------|-----------------|-----------------|-----------------|-----------------|----------------|
| <b>Complex 1</b> |          |                 |                 |                 |                 |                |
| O1               | H1A      | O5 <sup>1</sup> | 0.897(14)       | 1.855(16)       | 2.749(4)        | 174(6)         |
| O1               | H1A      | N2 <sup>1</sup> | 0.897(14)       | 2.61(2)         | 3.447(4)        | 155(4)         |
| O1               | H1B      | O5 <sup>2</sup> | 0.896(14)       | 1.872(17)       | 2.763(4)        | 172(4)         |
| O2               | H2A      | O8 <sup>3</sup> | 0.898(14)       | 1.88(2)         | 2.757(4)        | 165(4)         |
| O2               | H2B      | O8 <sup>4</sup> | 0.895(14)       | 1.862(16)       | 2.749(4)        | 171(5)         |
| O2               | H2B      | N3 <sup>4</sup> | 0.895(14)       | 2.63(3)         | 3.456(4)        | 155(4)         |
|                  |          |                 |                 |                 |                 |                |
|                  |          |                 |                 |                 |                 |                |
| <b>Complex 3</b> |          |                 |                 |                 |                 |                |
| O4               | H4       | O6 <sup>6</sup> | 0.863(9)        | 1.762(11)       | 2.5997(11)      | 163.0(19)      |
| O7               | H7A      | O6              | 0.859(19)       | 1.906(19)       | 2.7077(10)      | 154.8(18)      |
| O7               | H7B      | O1 <sup>5</sup> | 0.84(2)         | 1.88(2)         | 2.7125(9)       | 175.4(18)      |
| O4B              | H4B      | O6 <sup>6</sup> | 1.09            | 1.75            | 2.542(8)        | 125            |

<sup>1</sup>1/2+X,5/2-Y,+Z; <sup>2</sup>1+X,+Y,+Z; <sup>3</sup>-1+X,+Y,+Z; <sup>4</sup>-1/2+X,3/2-Y,+Z; <sup>5</sup>3/2-X,-1/2+Y,1/2-Z; <sup>6</sup>1/2+X,1/2-Y,-1/2+Z
